# Supplementary material for: Metabolic Signatures of Bacterial Vaginosis
Source: PubMed Central journal article supplement — mBio. 2015 Apr 14;6(2):e00204-15. doi: 10.1128/mBio.00204-15 (PMC4453549; doi:10.1128/mbio.00204-15), 2015-04-14
Supplement: mbo002152246sf1.pdf [file mbo002152246sf1.pdf]

# A: BV negative at baseline and follow-up

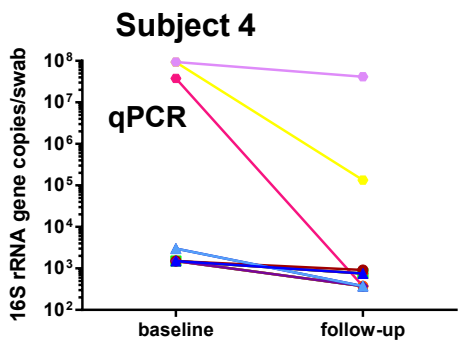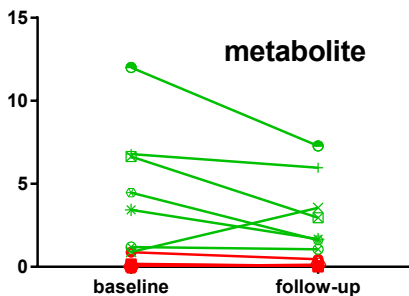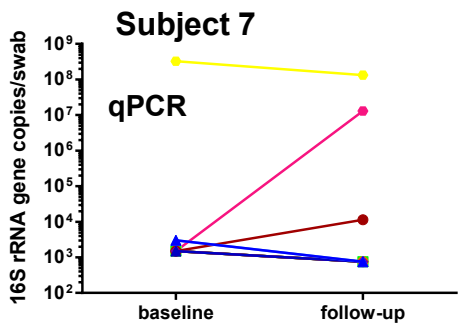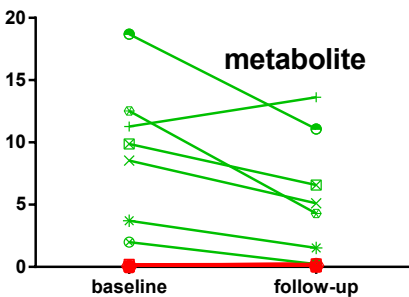

- ▲ BVAB1
- ▲ BVAB2
- ▲ BVAB3
- ◆ *Megasphaera spp.*
- *Gardnerella vaginalis*
- *Atopobium vaginae*
- ◆ *Leptotrichia/Sneathia spp.*
- ◆ *Eggerthella sp. type 1*
- *Prevotella timonensis*
- *Prevotella buccalis*
- *Prevotella amnii*
- ◆ *Lactobacillus crispatus*
- ◆ *Lactobacillus jensenii*
- ◆ *Lactobacillus iners*
- ▲ agmatine
- cadaverine
- deoxycarnitine
- ◆ N-acetylputrescine
- pipecolate
- succinate
- tyramine
- ✕ glutamate
- ✱ glutathione, reduced (GSH)
- + lactate
- ⊗ sphingosine
- tyrosine
- ⊠ phenylalanine
- ⊗ glycylproline

## B: Recurrent BV

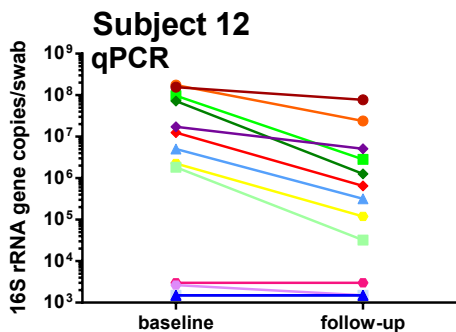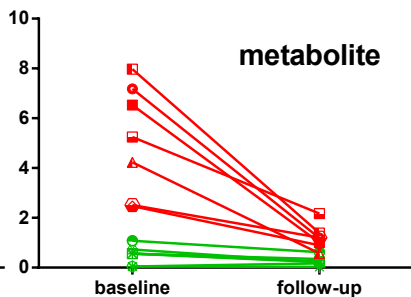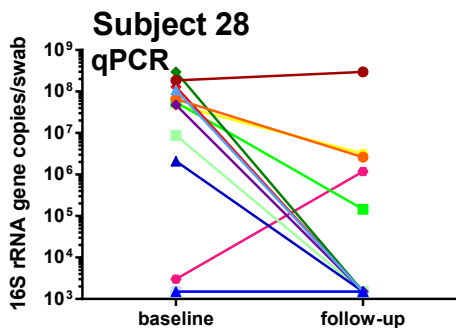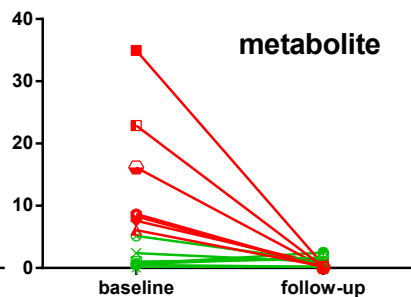

▲ BVAB1

▲ BVAB2

▲ BVAB3

◆ *Megasphaera* spp.

● *Gardnerella vaginalis*

● *Atopobium vaginae*

◆ *Leptotrichia/Sneathia* spp.

◆ *Eggerthella* sp. type 1

■ *Prevotella timonensis*

■ *Prevotella buccalis*

■ *Prevotella amnii*

● *Lactobacillus crispatus*

● *Lactobacillus jensenii*

● *Lactobacillus iners*

▲ agmatine

■ cadaverine

■ deoxycarnitine

◆ N-acetylputrescine

● pipecolate

● succinate

■ tyramine

× glutamate

× glutathione, reduced (GSH)

+ lactate

⊗ sphingosine

● tyrosine

⊗ phenylalanine

⊗ glycylproline
