# Supplementary material for: Metabolic Signatures of Bacterial Vaginosis
Source: PubMed Central journal article supplement — mBio. 2015 Apr 14;6(2):e00204-15. doi: 10.1128/mBio.00204-15 (PMC4453549; doi:10.1128/mbio.00204-15), 2015-04-14

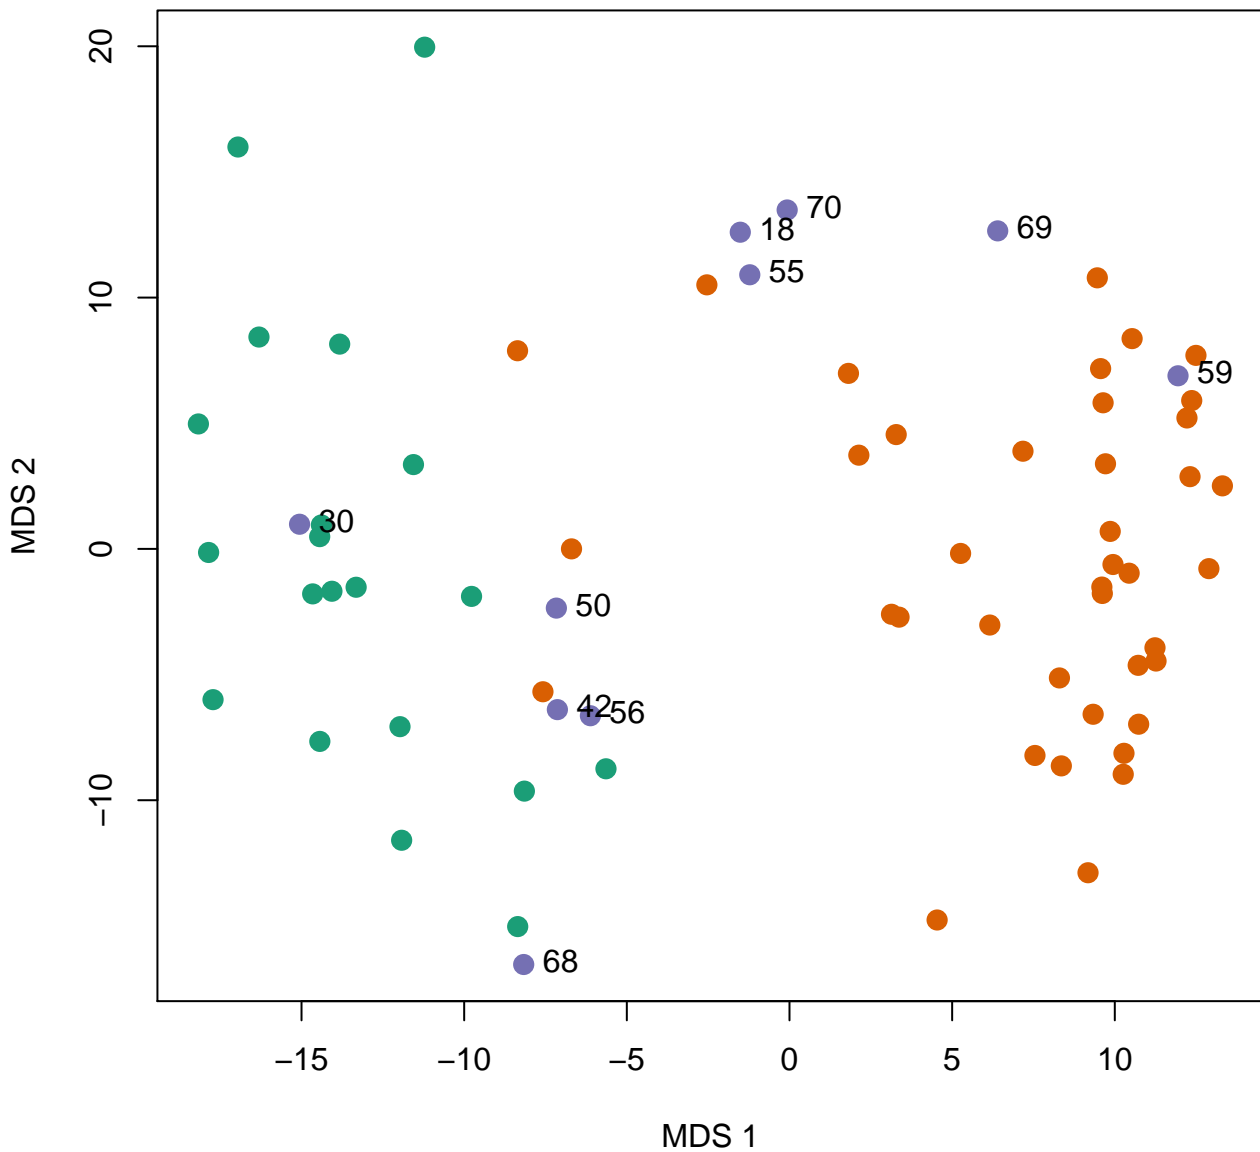

Supplement: mbo002152246sf3.pdf [file mbo002152246sf3.pdf]
